# Supplementary material for: Improving Person-Centredness in Integrated Care for Older People: Experiences from Thirteen Integrated Care Sites in Europe
Source: PubMed Central journal article supplement (PMC7319083; doi:10.5334/ijic.5427), 2020-06-26
Supplement: ijic-20-2-5427-s2.pdf [file ijic-20-2-5427-s2.pdf]

## Appendix 2: Proposition analysis framework for site-specific overarching analysis

**NAME OF SITE AND COUNTRY:**

| PROPOSITION                                                                                                                                                     | THEMATIC STATEMENTS SUPPORTING PROPOSITION | RIVAL EXPLANATIONS (THEMATIC STATEMENTS NOT SUPPORTING PROPOSITION) |
|-----------------------------------------------------------------------------------------------------------------------------------------------------------------|--------------------------------------------|---------------------------------------------------------------------|
| <b>1. Integrated care activities will maintain or enhance person-centredness, prevention orientation, safety, efficiency and co-ordination in care delivery</b> | Person-centredness                         | Person-centredness                                                  |
|                                                                                                                                                                 |                                            |                                                                     |
|                                                                                                                                                                 | Prevention orientation                     | Prevention orientation                                              |
|                                                                                                                                                                 |                                            |                                                                     |
|                                                                                                                                                                 | Safety                                     | Safety                                                              |
|                                                                                                                                                                 |                                            |                                                                     |
|                                                                                                                                                                 | Efficiency                                 | Efficiency                                                          |
|                                                                                                                                                                 |                                            |                                                                     |
| <b>2. Explanations for</b>                                                                                                                                      | Co-ordination                              | Co-ordination                                                       |
|                                                                                                                                                                 |                                            |                                                                     |

**succeeding in improving  
existing integrated care  
initiatives will be  
identified**

**Notes**

**What seems to work and with what outcomes when making improvements to integrated care?**

**What are the explanations for succeeding and improving integrated care initiatives?**

**What are the explanations for NOT succeeding and improving integrated care initiatives?**

|  |
|--|
|  |
|--|

|                            |
|----------------------------|
| <b>Overall Reflections</b> |
|----------------------------|

|                                                                                                                                                    |
|----------------------------------------------------------------------------------------------------------------------------------------------------|
| <b>Are there any factors that are particularly strong in your analysis that could be seen as having an impact on integrated care improvements?</b> |
|----------------------------------------------------------------------------------------------------------------------------------------------------|

|  |
|--|
|  |
|--|

|                                                                                                                                                 |
|-------------------------------------------------------------------------------------------------------------------------------------------------|
| <b>What factors can you identify in your site analysis that could apply to integrated care improvements across the EU, and be transferable?</b> |
|-------------------------------------------------------------------------------------------------------------------------------------------------|

|  |
|--|
|  |
|--|
